# Supplementary material for: Wave Mechanics of Microwave Absorption Films: Part 2 - Distinguishing Film from Material
Source: Research Square preprint supplement (doi:10.21203/rs.3.rs-3256776/v2), 2023-11-07
Supplement: Supplementary file 1 [file 7ecdf638300b39cef68c4b1a.docx]

**Supplementary Materials**

**The wave mechanics for microwave absorption film-Part 2: The difference between film and material**

Yue Liu1, *, Ying Liu1, Michael G. B. Drew2

1College of Chemistry and Chemical Engineering, Shenyang Normal University, Shenyang, P. R. China,110034, [yingliusd@163.com](mailto:yingliusd@163.com) (Ying Liu), [yueliusd@163.com](mailto:yueliusd@163.com) (Yue Liu)

2School of Chemistry, The University of Reading, Whiteknights, Reading RG6 6AD, UK,  [m.g.b.drew@reading.ac.uk](mailto:%20m.g.b.drew@reading.ac.uk)

This is paper 2 of a series work with three papers.

Paper 1: Part 1 -- A short review

Paper2：Part 2 -- The difference between film and material

Paper2：Part 3 -- Film with multilayers

**The connections between the three Parts 1, 2, and 3**

**Common in the three manuscripts:**

Microwave absorption of film originates from wave cancellation,

not from the attenuation power of material.

**Part 1:**

The absorption of film with metal-back originates from wave cancellation.

The absorption of film without metal-back also originates from wave cancellation and the strength of the transmitted beam t does not affect the result.

**Part 3:**

The absorption of the middle layer in the multilayer film also originates from wave cancellations at both sides of the layer even though there are incident beams at both sides of the layer.

**Part 2**:

Just like the interface in its isolated state is different from that in film, absorption in film is not the same as the attenuation power of material.

The problem concerned is significant since whether film and material are confused in the current theory of microwave absorption is the key issue disputed by material scientists and us.

We believe that the confusion of film and material has led to serious problems such as confusing the absorption mechanisms of film and material (see Part 1), the establishment of the flawed theory of the quarter wavelength (see Part 3) and the flawed theory of impedance matching (see our previous papers).

While material scientists do not accept our new theory because they believe that layered material, or material with multi-interface heterostructures such as core-shell, yolk-shell, and hollow structures is the same as film.

In Part 1 we have reviewed our previous work about that the absorption mechanisms of film and material are different.

In Part 2 we have proved irrefutably that the absorption of film is not the attenuation of material.

In part 3 we point out that material with multi-interface heterostructures such as core-shell, yolk-shell, and hollow structures are uniform material which has averaged *εr* and *μr*. Such material behaves as single-phase material. As a whole, multilayered material also behaves as single-phase material. Such material is material rather than film. Our theory developed in Part 3 can be used to study the relationship between material structure and material properties such as *εr* and *μr* via film with multilayers.

---------------

**Novelty**

**Part 3: Film with multilayers**

There is no suitable theory developed for multilayer film and as indicated by refs [56 – 62] in the manuscript, the results developed for the conventional films from single layer were wrongly used for such purpose.

In this work, we have developed a suitable theory from transmission line theory by noticing that the middle layer is different from the conventional film. We also show that the quarter wavelength theory cannot be applied in the design of multilayer film.

[Ref. #] is from Appendix 2 and [#] is from Appendix 3 in this Supplementary Materials.

Part 2 and Part 3 are independent and novel researches.

**Part 2:** **The difference between film and material**

Based on the amplitude attenuation of material *RL*(*x1+*) = exp(-*αPd*) (developed in [1]), we developed the functions (Equations 9 and 11 in Part 2) to describe the attenuation power of material in film with *A*(M-MB) and without *A*(M-WMB) metal-back. These functions have been used in Part 2 to show irrefutably that the absorption of film from wave cancellation is not the attenuation power of material from the zig-zag optical path. The two functions *A*(M-MB) and *A*(M-WMB) established in Part 2 have never previously been reported.

[1] Ying Liu, Michael G. B. Drew, Yue Liu, A physics investigation on impedance matching theory in microwave absorption film—Part 1: Theory, Journal of Applied Physics, 2023, 134, 045303, See eq. 8 in this paper.

[**https://doi.org/10.1063/5.0153608**](https://doi.org/10.1063/5.0153608)

Although we have pointed out previously that film and material are confused in the current theory of microwave absorption, providing arguments using completely different perspectives which are supported by experimental evidence, these conclusions have not yet been accepted by the research community.

**Part 1: A short review**

A new theory, involving wave mechanics for microwave absorption film, has been established from fundamental physics. Although, the theory has been proposed for serval years, it has not yet been accepted by the science community. The new theory is contrary to the current theory, possibly because it is believed by many material scientists that experimental data “support” the current theory.

However, in this work, we have demonstrated that the published data are in fact inconsistent the current theory.

The bases of this Part 1:

[4] Ying Liu, Yi Ding, Yue Liu, Michael G. B. Drew.[Unexpected Results in Microwave Absorption – Part 2:. Angular effects and the wave cancellation theory](https://doi.org/10.1016/j.surfin.2023.103024), Surfaces and Interfaces, 2023, 40, 103024

<https://doi.org/10.1016/j.surfin.2023.103024>

[8] A Re-evaluation of the Mechanism of Microwave Absorption in Film – Part 2: The Real Mechanism, Materials Chemistry and Physics, 2022, 291, 126601

<https://doi.org/10.1016/j.matchemphys.2022.126601>

-------

**Background**

It is believed in the mainstream theory that microwaves are trapped in the film by the back-and-forth reflections in the film and absorbed by the attenuation power of material. We have proved previously that the absorption mechanisms for film and for material are different. The absorption of material originates from the attenuation power of material, while the absorption of film originates from wave cancelation.

**Main contents**

This manuscript uses wave superposition theory covered by general physics to solve problems in the field of microwave absorption material. It is theoretical research concerned with overturning accepted theory and establishing a new theory.

**Reliability**

Accepted theory can be wrong and should be allowed to be challenged [Ref 1 - Ref. 5].

This work provides a significant addition to our previous studies on microwave absorption. [0 – 21] listed in Appendix 3. It should be noted that our views, different from the mainstream theory, have been available for quite some time, and our relevant papers have been viewed or downloaded many times as shown by [10 – 12, 14]. There have been no substantial negative comments published since 2017.

We note that in science, a breakthrough is always achieved first by the minority [Ref. 6].

**Significance**

The work relates to set up a completely new theory for microwave absorption. Similar to quantum mechanics, many new concepts developed in this theory for film show fascinating aspects of wave mechanics.

We believe that our work has substantially advance fundamental and applied physical science. It opens a new research avenue for film absorption within established physics. It takes essential steps in solving critical problems and has introduced new theory with significant impact.

In previous work, we have developed a systematical theoretical system for microwave absorption, introducing many unexpected concepts completely different from the currently accepted theory. Our new theory is simple and pertinent and consistent with all published experimental data.

However, it must be admitted that our new theory has not yet been generally accepted by the research community. This was not unexpected as overturning accepted theories has proved to be difficult in modern times. Professor Braben attributes the reason to peer review (“the introduction in the 1970s of the (peer) review of research proposals has led to a dearth of big scientific discoveries … To submit those ideas to peer review is disastrous” [Ref. 9]), but we believe that the other reason must be that modern scientists do not value theoretical research via direct mathematical reasoning as done by this work to reveal the real nature behind experimental phenomena. The theoretical proofs for the current theories are complex and wrong [2, 9].

Journals should be places where different views confront each other and initiate dialogue between opposing researchers. These completely different perspectives from the current theory have already been published for several years but the practice of using the wrong theory still continues in many publications where the reviewers have not reminded authors of any requirement to comment on other opposite theories already available [Ref. 1 Ref. 3 - Ref. 5, Ref. 8, Ref. 9]. “Scientists are often tardy in fixing basic flaws in their sciences despite the presence of better alternatives” [Ref 1], “The academic world is conservative” [Ref. 2], "A new scientific truth does not triumph by convincing its opponents and making them see the light” [Ref 3], “some scientists wondered how a questionable line of research persisted for so long … experts were just too timid to take a stand” [Ref 4], and “To submit those ideas to peer review is disastrous" [ref. 9]. The purposes of this work are to provide further evidence for our conclusions and to shorten the period for the new theory to replace the current theory.

**Generality**

We believe that the contents of these papers are of general interest since they offer a new insights into the interpretation of microwave absorption.

- The background of this work is transmission-line theory but only wave superposition covered by general physics is involved.
- The formulae involved are reflection loss *RL* for film, reflection coefficient *RM* and transmission coefficient *γM* for the interface, but they should be very familiar to material scientists. It should be noted that the mainstream theory also claims to be based on transmission-line theory but this is a misapplication.
- The mathematical skills involved are mainly within the training of junior middle school.

The only difficulties that scientists might find in our theories are that they include many new concepts contrary to those of the long-held mainstream theories. The wrong concepts have been accepted and as a result correct new concepts are likely be superficially considered as contrary to commonsense. For example, it is proved by us that the voltage amplitude of individual beam involved for film can be greater than that of the incident beam which seems contradictory to energy conservation [7]. In addition, unexpected results are obtained including that the beam absorbed maximumly in film results in its transmitted beam into open space also be maximized [4, 8] and that the best absorption film may be composed of material with less attenuation power and with less microwave penetration since maximizing these properties cannot ensure maximum absorption of film [3]. This is contrary to the common conclusion that *RL* is a parameter for film rather than for material [5, 6, 10] and to common practice in treating film and material equivalently. The fact that interface in its isolated state behaves differently than in film [2, 4] remained unnoticed for a long time.

**Appendix 1**

Our concerns about the peer review process

**Appendix 2**

Classified references labeled as [ref #]

**Appendix 3**

Authors’ main publications (related to this subject) labeled as [#]

**Appendix 4**

Lessons manifested from this work

**Appendix 1 Our concerns about the peer review**

The difficulty in finding reviewers for our papers is indicative of a common problem that we are finding when submitting our papers on this subject. It seems likely that reviewers are more comfortable in assessing experimental data than theoretical work which involves understanding significant amounts of mathematics even though they are not sophisticated, and the formulae involved should be familiar to scientists in the field. Thus, we would like the share the following views with the Editor.

**View 1: Comments to peer review**

We believe that manuscripts providing arguments against mainstream commonly held theories need to be considered carefully by reviewers who are prepared to spend time carefully evaluating our point of view. Too often we have received the unsatisfactory response that the mainstream theories are commonly accepted and therefore must be correct while failing to discuss our theoretical breakthrough [Ref. 7]. We would like reviewers to discuss our theories in detail and point out any possible flaws that they detect but this is seldom done.

Since the subject of the manuscript provides an opportunity for significant progress in the science of microwave absorption, the delay in reviewing is not so important. What is important is to ensure that the reviewers and the authors communicate back and forth until common views have been reached since any new theory is likely to be misinterpreted while the accepted theory remains unchallenged. If common views are unable to be reached between authors and reviewers, then the manuscript should be published to seek opinions from the scientific community.

Such work should not remain unpublished just because reviewers reject it for insubstantial reasons [Ref. 2 – Ref. 4, Ref. 8, Ref. 9] since journals are places where different ideas confront. Otherwise, journals will become platforms for defending the status quo.

For that reason, if no scientific flaws can be identified by reviewers, then it should be possible for the authors and reviewers to find common ground.

**View 2: Comments about the continued practice of using the wrong theory**

What concerns us is that nearly all the papers published recently in different journals on microwave absorption still use the current theory without mentioning the opposing views. It seems that no reviewers suggest that the authors comment on our opposite views especially our work has already available for several years [10 – 12, 14].

**View 3: Suggestion for peer reviewing**

When a manuscript argues against an accepted theory, a breakthrough has likely been achieved if the arguments can be confirmed. Thus, for such a manuscript, it deserves to be openly debated via publishing in a repeatable journal if the reviewers and the authors cannot achieve common views, or if reviewers cannot be found [Ref. 4, Ref. 10]. Such work should not be killed just because the reviewers dislike it for trivial reasons [Ref. 2, Ref. 6, Ref. 8, Ref. 9], since journals are places where the progress of science is encouraged. Otherwise, journals will become platforms for defending past fame and reputation [Ref. 1, Ref. 3, Ref. 7 – Ref. 9].

The new theory is likely to be misunderstood since the mainstream theory is paramount [Ref. 2, Ref. 8, Ref. 9]. Thus, many rounds of back-and-forth communications between reviewers and the authors might be necessary.

**View 4 Suggestion for reviewers**

We prefer teachers who teach physics as reviewers since it has been proved from our previous submissions that most material researchers only superficially know the principle covered by college physics but do not really understand those basic principles even though they were trained in physics or microwave engineering.

**Appendix 2 Classified references labeled as [Ref #]**

[Ref. 1] “Can so many scientists have been wrong over the eighty years since 1925? Unhappily, yes. The mainstream in science, as any scientist will tell you, is often wrong. Otherwise, come to think of it, science would be complete. Few scientists would make that claim, or would want to. Statistical significance is surely not the only error in modern science, although it has been, as we will show, an exceptionally damaging one. Scientists are often tardy in fixing basic flaws in their sciences despite the presence of better alternatives. Think of the half century it took American geologists to recognize the truth of drifting continents, a theory proposed in 1915 by—of all eminently ignorable people—a German meteorologist. Scientists, after all, are human. What Nietzsche called the ‘twilight of the idols,’ the fear of losing a powerful symbol or god or technology, haunts us all”

Ziliak, S. T. and McCloskey, D. N. (2008). The cult of statistical significance: how the standard error costs us jobs, justice, and lives. University of Michigan Press

[Ref. 2] Nobel laureate Tasuku Honjo: “First-class work often overturns the established conclusion, so it is unpopular. The reviewers cannot fully understand your work and will give you many negative comments, …. Articles catering to the trend of the times are easy to be accepted, otherwise, it will take a long time to get recognized” (2000) and “If your research can’t overturn the established conclusion, science can’t progress. Of course, your research will be not recorded in history. The academic world is conservative. If you don’t write your paper according to the existing conclusion, it will be very difficult for your paper to be accepted, and you will suffer a lot, but the research that can survive in history is exactly this kind of research.“ (2013)

<https://dataverse.harvard.edu/file.xhtml?fileId=5112614&version=1.1>

[Ref. 3] “A new scientific truth does not triumph by convincing its opponents and making them see the light, but rather because its opponents eventually die, and a new generation grows up that is familiar with it”

M. Planck, Scientific Autobiography and Other Paper, William & Norgate, London, 1950, pp. 33 -34.

[Ref. 4] “some scientists wondered how a questionable line of research persisted for so long … experts were just too timid to take a stand.”

Harvard calls for retraction of dozens of studies by noted cardiologist, New York Times, [http://www.staradvertiser.com/2018/10/16/news/harvard-calls-for-retraction-of-dozens-of-studies-by-noted-cardiologist/. 16 Oct 2018](http://www.staradvertiser.com/2018/10/16/news/harvard-calls-for-retraction-of-dozens-of-studies-by-noted-cardiologist/.%2016%20Oct%202018)

[Ref. 5] S. Vazire, A toast to the error detectors, Nature 577(7788) (2020) 9.

[https://doi.org/10.1038/d41586-019-03909-2](https://doi.org/10.1038/d41586-019-03909-2.)

[Ref. 6] “Poster 1: Charles Townes and the Laser

…

[After] we had been at it for two years, Rabi and Kusch, the former and current chairman of the department — both of them Nobel laureates for work with atomic and molecular beams, and both with a lot of weight behind their opinions — came into my office and sat down. They were worried. Their research depended on support from the same source as did mine. ‘Look,’ they said, ‘you should stop the work you are doing. It isn‘t going to work. You know it‘s not going to work. We know it‘s not going to work. You‘re wasting money. Just stop!’

But Townes had come to Columbia on tenure, so he knew he couldn’t be fired for incompetence or ordered around. Nevertheless, the awesome weight of Rabi‘s reputation in particular — a one-time senior member of the Massachusetts Institute of Technology‘s legendary Radiation Laboratory set up by Vannevar Bush to develop wartime radar — must have been daunting. Such top brass cannot be defied lightly, and showing extraordinary courage, this junior faculty member stood his ground, and respectfully told his exalted colleagues that he would continue. Two months later (in April 1954), his experiment worked, and the maser (microwave amplification by stimulated emission of radiation) was born. Three years after that Arthur Schawlow, Townes‘ postdoc at Columbia, had moved to the Bell Laboratories, and their collaboration led to the optical version of the maser — the laser. Townes was awarded the Nobel Prize in Physics in 1964 for these discoveries [shared with Aleksander Prokhorov and Nikolai Basov (USSR), who developed the maser and laser independently]. Schawlow was awarded the Nobel Prize for Physics in 1981 for his work on laser spectroscopy.”

Donald W. Braben – Scientific Freedom – The Elixir of Civilization, Wiley Interscience (2008)

[Ref. 7] “So we have little evidence on the effectiveness of peer review, but we have considerable evidence on its defects. In addition to being poor at detecting gross defects and almost useless for detecting fraud it is slow, expensive, profligate of academic time, highly subjective, something of a lottery, prone to bias, and easily abused.”

<https://www.ncbi.nlm.nih.gov/pmc/articles/PMC1420798>

Peer review: a flawed process at the heart of science and journals

[Ref. 8] “Now pretty much every journal uses outside experts to vet papers, and papers that don‘t please reviewers get rejected … Weak-link thinking makes scientific censorship seem reasonable, but all censorship does is make old ideas harder to defeat. Remember that it used to be obviously true that the Earth is the center of the universe, and if scientific journals had existed in Copernicus‘ time, geocentrist reviewers would have rejected his paper and patted themselves on the back for preventing the spread of misinformation. Eugenics used to be hot stuff in science—do you think a bunch of racists would give the green light to a paper showing that Black people are just as smart as white people? Or any paper at all by a Black author? (And if you think that‘s ancient history: this dynamic is still playing out today.) We still don‘t understand basic truths about the universe, and many ideas we believe today will one day be debunked. Peer review, like every form of censorship, merely slows down truth.”

<https://www.experimental-history.com/p/the-rise-and-fall-of-peer-review>

The rise and fall of peer review

[Ref. 9] “Professor Braben argues that the introduction in the 1970s of the (peer) review of research proposals has led to a dearth of big scientific discoveries. The most radical ideas, he says, are unlikely to get funded because it is difficult to impress peers before they have been proven. … It (peer review) works well enough in the mainstream but it is at the margins where major discoveries are made, where people don’t believe in the current wisdom and want to head off into dramatically different directions. To submit those ideas to peer review is disastrous”

<https://www.timeshighereducation.com/news/kill-peer-review-save-civilisation/401457.article?storyCode=401457&site=cn>

Kill peer review, save civilization

[Ref. 10] “On the off chance you do figure out a way to improve peer review without also making it worse, you can try convincing the nearly 30,000 scientific journals in existence to apply your magical method to the ~4.7 million articles they publish every year. Good luck!”

<https://www.experimental-history.com/p/the-rise-and-fall-of-peer-review>

The rise and fall of peer review

[Ref. 11] Beyond these considerations, the importance of many of the more recent developments cannot be evaluated objectively at this time. The history of mathematics teaches us that many subjects which aroused tremendous enthusiasm and engaged the attention of the best mathematicians ultimately faded into oblivion ... Indeed one of the interesting questions that the history answers is what survives in mathematics. History makes its own and sounder evaluations.

--Morris Kline, Mathematical Thought from Ancient to Modern Times, Oxford University Press, 1972, ISBN 0-19-506136-5

作者表达的意思是：历史是最公正的。历史反复证明，那些在当世喧嚣尘上的东西往往是主流学者刻意炒作的糟粕，而那些被当世打压的经常是真金白银。

**Appendix 3 Authors’ main publications (related to this subject) labeled as [#]**

A list of our previous publications for establishing the bases of the subject “Wave mechanics for microwave absorption film”. “Wave mechanics for microwave absorption film” is a subject based on simple science.

We have worked on the subject over several years with several publications listed below [0 – 21], each paper concerned some radical views from a different perspective. Refs. [0 – 12] concentrated on film and [13 – 21] on material.

<https://www.growkudos.com/profile/yue_liu_2>

[0] Ying Liu, Michael. G.B. Drew, Yue Liu, Chapter 4: Fundamental Theory of Microwave Absorption for Films of Porous Nanocomposites: Role of Interfaces in Composite-Fillers, in [Porous Nanocomposites for Electromagnetic Interference Shielding](https://shop.elsevier.com/books/porous-nanocomposites-for-electromagnetic-interference-shielding/thomas/978-0-323-90035-5), Edited by: Avinash R. Pai, Claudio Paoloni, Sabu Thomas, 2023, Elsevier, in press [978-0-323-90035-5_B978-0-323-90035-5.00013-1]

<https://shop.elsevier.com/books/porous-nanocomposites-for-electromagnetic-interference-shielding/thomas/978-0-323-90035-5>

[1] Ying Liu, Michael G. B. Drew, Yue Liu, A physics investigation on impedance matching theory in microwave absorption film—Part 1: Theory, Journal of Applied Physics, 2023, 134, 045303

<https://doi.org/10.1063/5.0153608>

[2] Ying Liu, Michael G. B. Drew, Yue Liu, A physics investigation on impedance matching theory in microwave absorption film—Part 2: Problem Analyses, Journal of Applied Physics, 2023, 134, 045304

<https://doi.org/10.1063/5.0153612>

[3] Ying Liu, Yi Ding, Yue Liu, Michael G. B. Drew. [Unexpected Results in Microwave Absorption – Part 1: Different absorption mechanisms for metal-backed film and for material](https://doi.org/10.1016/j.surfin.2023.103022), Surfaces and Interfaces, 2023, 40, 103022

<https://doi.org/10.1016/j.surfin.2023.103022>

[4] Ying Liu, Yi Ding, Yue Liu, Michael G. B. Drew.[Unexpected Results in Microwave Absorption – Part 2:. Angular effects and the wave cancellation theory](https://doi.org/10.1016/j.surfin.2023.103024), Surfaces and Interfaces, 2023, 40, 103024

<https://doi.org/10.1016/j.surfin.2023.103024>

[5] Ying Liu; Xiangbin Yin; M. G. B. Drew; Yue Liu, Microwave absorption of film explained accurately by wave cancellation theory, Physica B: Condensed Matter, 2023, 666, 415108

<https://doi.org/10.1016/j.physb.2023.415108>

([Microwave absorption of film explained accurately by wave cancellation theory](https://scite.ai/reference-check/01673d25-5967-4223-9c46-d8d1e9f73548?utm_source=preprint_reference_check&utm_medium=email&utm_campaign=preprint_reference_check), [2023-02-23](https://scite.ai/reference-check/03bbd9b6-3305-4fdd-96ad-d1fc84cc16e3?utm_source=preprint_reference_check&utm_medium=email&utm_campaign=preprint_reference_check) | Preprint,[Research Square](https://www.researchsquare.com/article/rs-2616469/v2), DOI: [10.21203/rs.3.rs-2616469/v2](https://doi.org/10.21203/rs.3.rs-2616469/v2))

[6] Reflection Loss is a Parameter for Film, not Material, Non-Metallic Material Science, 2023, 5(1): 38-48.

<https://doi.org/10.30564/nmms.v5i1.5602>

[7] A Re-evaluation of the Mechanism of Microwave Absorption in Film – Part 1: Energy Conservation, Materials Chemistry and Physics, 2022, 290, 126576

<https://doi.org/10.1016/j.matchemphys.2022.126576>

[8] A Re-evaluation of the Mechanism of Microwave Absorption in Film – Part 2: The Real Mechanism, Materials Chemistry and Physics, 2022, 291, 126601

<https://doi.org/10.1016/j.matchemphys.2022.126601>

[9] A re-evaluation of the Mechanism of Microwave Absorption in Film – Part 3: Inverse Relationship, Materials Chemistry and Physics, 2022, 290, 126521

<https://doi.org/10.1016/j.matchemphys.2022.126521>

[10] A theoretical investigation of the quarter-wavelength model — part 2: verification and extension. Physica Scripta 2022, 97(1): 015806, has been downloaded 359 times.

<https://iopscience.iop.org/article/10.1088/1402-4896/ac1eb1>

[11] A theoretical investigation on the quarter-wavelength model — part 1: analysis. Physica Scripta 2021, 96(12): 125003, has been downloaded 324 times.

<https://iopscience.iop.org/article/10.1088/1402-4896/ac1eb0>

[12] A theoretical analysis of the relationships shown from the general experimental results of scattering parameters *s11* and *s21* – exemplified by the film of BaFe12-iCeiO19/polypyrene with i = 0.2, 0.4, 0.6. Journal of Microwave Power and Electromagnetic Energy 2021, 55(3): 197-218, has been downloaded 176 times.

<https://www.tandfonline.com/doi/full/10.1080/08327823.2021.1952835>

[13] An experimental and theoretical investigation into methods concerned with “reflection loss” for microwave absorbing materials. Materials Chemistry and Physics 2020, 243: 122624

<https://linkinghub.elsevier.com/retrieve/pii/S0254058420300067>

[14] A theoretical and practical clarification on the calculation of reflection loss for microwave absorbing materials. AIP Advances 2018, 8(1): 015223, has viewed more than 5000 times.

<https://aip.scitation.org/doi/full/10.1063/1.4991448>

[15] A systemized parameter set applicable to microwave absorption for ferrite based materials. Journal of Materials Science: Materials in Electronics 2017, 29(2): 1562-1575

<https://link.springer.com/article/10.1007/s10854-017-8066-0>

Other relevant publications

[16] Microwave absorption properties of Ag/NiFe2-xCexO4 characterized by an alternative procedure rather than the main stream method using “reflection loss”. Materials Chemistry and Physics 2020, 243: 122615.

<https://doi.org/10.1016/j.matchemphys.2019.122615>

[17] Several Theoretical Perspectives of Ferrite-Based Materials—Part 1: Transmission Line Theory and Microwave Absorption. Journal of Superconductivity and Novel Magnetism 2017, 30(9): 2489-2504.

<http://dx.doi.org/10.1007/s10948-017-4043-3>

[18] Several Theoretical Perspectives of Ferrite-Based Materials—Part 2: Close Packing Model for Crystal Structure. Journal of Superconductivity and Novel Magnetism 2017, 30(10): 2777-2789.

<http://dx.doi.org/10.1007/s10948-017-4042-4>

[19] Several Theoretical Perspectives of Ferrite-Based Materials-Part 3: Crystal Structure and Synthesis. Journal of Superconductivity and Novel Magnetism 2017, 30(11): 3019-3025

<http://dx.doi.org/10.1007/s10948-017-4040-6>

[20] Characterization microwave absorption from active carbon/BaSmxFe12−xO19/polypyrrole composites analyzed with a more rigorous method. Journal of Materials Science: Materials in Electronics 2019, 30(2): 1936-1956.

<http://dx.doi.org/10.1007/s10854-018-0467-1>

[21] Preparation and characterization of BaSmxFe12 – xO19/polypyrrole composites. Journal of Materials Science: Materials in Electronics 2018, 29(15): 13148-13160

<https://doi.org/10.1007/s10854-018-9438-9>

**Appendix 4 Lessons manifested from this work**

Lesson 1

The wrong theories which are currently held can be corrected using

- the basic tenets of the transmission-line theory, that is, the wave superposition principle and Kirchhoff's voltage and current laws, all of which are covered by General Physics.
- The formulae involve reflection loss *RL* and reflection and transmission coefficients of interfaces which are very familiar to material scientists.
- The mathematical techniques used are not beyond junior middle school training.

However, the wrong theories have been dominant in the field and their errors have remained unidentified for a long time. It shows that some modern researchers are still used to following current practice without considering the theoretical background. (“Scientists are often tardy in fixing basic flaws in their sciences despite the presence of better alternatives” [Ref 1], "A new scientific truth does not triumph by convincing its opponents and making them see the light, but rather because its opponents eventually die, and a new generation grows up that is familiar with it." [Ref 3]).

Lesson 2

Our first paper on the subject was published online in 2017 [15] and subsequently, our papers have been viewed many times (over 5000 times for [14] alone, downloaded more than 400 times for each of our papers among [10, 11]). But the wrong practice has continued in publications almost without comments on our different views.

The lesson is that when an accepted theory is overturned by a new theory, then the validity of the new theory should be determined from academic arguments rather than judging from the popularity of the current theory. Advances in science in history are always first identified by some particular group or individual correcting commonly held beliefs.

Lesson 3

History has repeatedly shown that the scientific community is conservative and reluctant to change. However, this important lesson is sometimes ignored by scientists [Ref. 2, Ref. 3].
